# Supplementary material
Source: MDPI journal article supplement (https://www.mdpi.com/2072-4292/14/1/151)
Supplement: s1 [file s1]

## Article

# Multiple Effects of Topographic Factors on Spatio-Temporal Variations of Vegetation Patterns in the Three Parallel Rivers Region, Southeast Qinghai-Tibet Plateau

Chunya Wang <sup>1,2,3</sup>, Jinniu Wang <sup>1,2 \*</sup>, Niyati Naudiyal <sup>1</sup>, Ning Wu <sup>1</sup>, Xia Cui <sup>4</sup>, Yanqiang Wei <sup>5</sup> and Qingtao Chen <sup>3</sup>

<sup>1</sup> Chengdu Institute of Biology, Chinese Academy of Sciences, Chengdu 610041, China;

wangcy9610@gmail.com (C.W.); naudiyal.niyati@gmail.com (N.N.); wuning@cib.ac.cn (N.W.)

<sup>2</sup> Mangkang Ecological Monitoring Station, Tibet Ecological Security Barrier Ecological Monitoring Network, Qamdo 854000, Tibet, China

<sup>3</sup> Earth Sciences College, Chengdu University of Technology, Chengdu 610059, China; cqtc@cdut.edu.cn (Q.C.)

<sup>4</sup> School of Resources and Environmental Sciences, Lanzhou University, Lanzhou 730000; China, xiacui@lzu.edu.cn (X.C.)

<sup>5</sup> Northwest Institute of Eco-Environment and Resources, Chinese Academy Sciences, Lanzhou 730000; China, weiyq@lzb.ac.cn (Y.W.)

\* Correspondence: wangjn@cib.ac.cn

**Supplementary Materials:** The following are available online at [www.mdpi.com/xxx/s1](http://www.mdpi.com/xxx/s1), **Table S1:** Classification of topographic factors in the study area, **Figure S1:** Variation characteristics of mean NDVI with different topographic factors, **Figure S2:** Spatial distribution of mean NDVI with different topographic factors during 2000–2019, **Table S2:** Annual mean NDVI area statistics for different topographic factors during 2000–2019, **Figure S3:** NDVI trends during 2000–2019 with different topographic factors in the basin (a, b, c show elevation, slope and aspect respectively), **Figure S4:** Spatial distribution of NDVI trends for different topographic factors from 2000 to 2019, **Table S3:** Area statistics of NDVI trends for different stopographic factors from 2000 to 2019, **Table S4:** Parameter estimation and test results of the OLS model, **Figure S5:** Estimation result of regression coefficients obtained through OLS modeling. (Notes: for the entire regression equation, the adjustment R<sup>2</sup> is 0.03, F value is 60.76, and  $P < 0.01$ ; the two dashed lines denote that the t-value is equal to  $-1.96$  and  $1.96$  respectively; at 0.05 significance level,  $t < -1.96$  means a significantly negative correlation, while  $t > 1.96$  represents a positive correlation.), **Table S5:** Comparison of model performance between the GWR and OLS models.

**Table S1.** Classification of topographic factors in the study area.

| Class | Elevation(m) | Proportion (%) | Slope(°) | Proportion (%) | Aspect                                            | Proportion (%) |
|-------|--------------|----------------|----------|----------------|---------------------------------------------------|----------------|
| 1     | <1000m       | 0.23%          | <5°      | 27.70%         | Flat(-1)                                          | 0.30%          |
| 2     | 1000–1500m   | 1.22%          | 5–8°     | 11.36%         | Shady slope (0–67. 5°, 337. 5–360°)               | 26.13%         |
| 3     | 1500–2000m   | 3.62%          | 8–15°    | 23.82%         | Semi-shady slope (67. 5–112. 5°, 292. 5–337. 5°)  | 24.15%         |
| 4     | 2000–2500m   | 5.08%          | 15–25°   | 25.23%         | Semi-sunny slope (112. 5–157. 5°, 247.5 –292. 5°) | 23.87%         |
| 5     | 2500–3000m   | 4.31%          | 25–35°   | 10.40%         | Sunny slope (157. 5–247. 5°)                      | 25.55%         |
| 6     | 3000–3500m   | 4.35%          | >35°     | 1.47%          |                                                   |                |
| 7     | 3500–4000m   | 7.07%          |          |                |                                                   |                |
| 8     | 4000–4500m   | 19.63%         |          |                |                                                   |                |
| 9     | 4500–5000m   | 42.76%         |          |                |                                                   |                |
| 10    | 5000–5500m   | 11.18%         |          |                |                                                   |                |
| 11    | >5500m       | 0.55%          |          |                |                                                   |                |

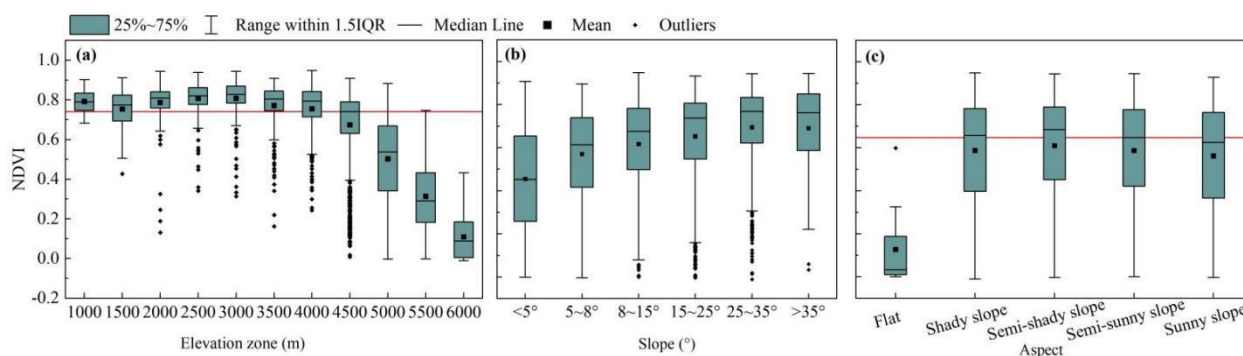

**Figure S1.** Variation characteristics of mean NDVI with different topographic factors.

**(a) Elevation**

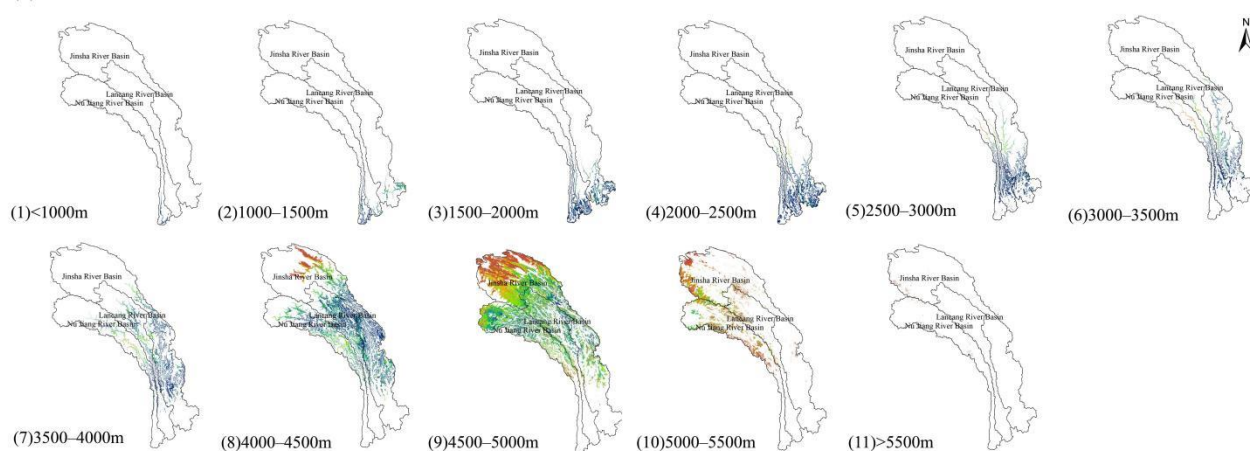

**(b) Slope**

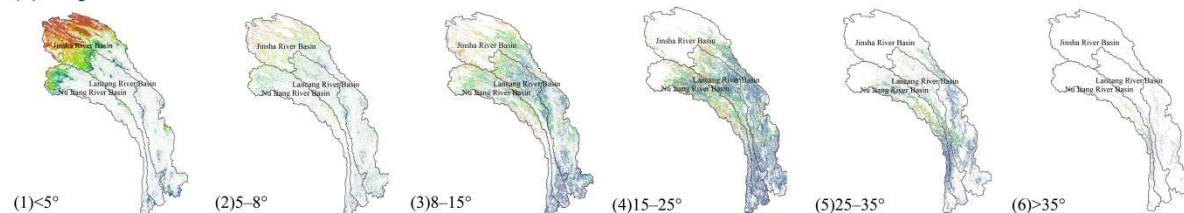

**(c) Aspect**

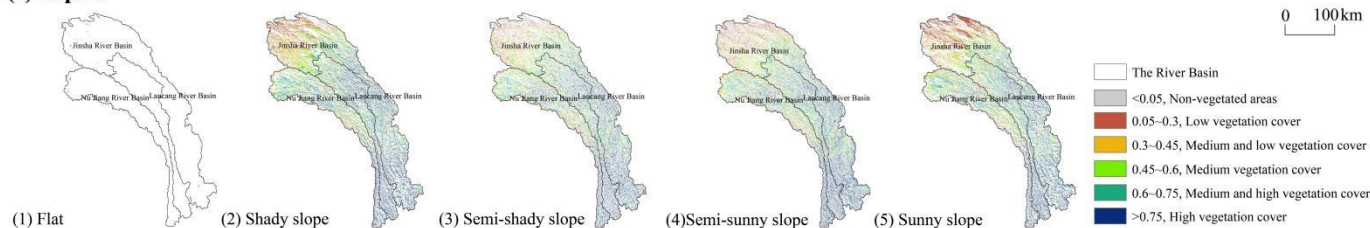

**Figure S2.** Spatial distribution of mean NDVI with different topographic factors during 2000–2019.

**Table S2.** Annual mean NDVI area statistics for different topographic factors during 2000–2019.

| Topographic factors | Vegetation cover | Non-vegetated areas (NDVI<0.05) | Low vegetation cover (0.05~0.3) | Medium and low vegetation cover (0.3~0.45) | Medium vegetation cover (0.45~0.6) | Medium and high vegetation cover (0.6~0.75) | High vegetation cover (NDVI>0.75) |
|---------------------|------------------|---------------------------------|---------------------------------|--------------------------------------------|------------------------------------|---------------------------------------------|-----------------------------------|
| Elevation           | <1000m           | -                               | 0.02%                           | 0.11%                                      | 1.33%                              | 22.76%                                      | 75.77%                            |
|                     | 1000–1500m       | -                               | 0.89%                           | 0.98%                                      | 3.99%                              | 28.04%                                      | 66.10%                            |

|        |                  |               |               |        |        |               |               |
|--------|------------------|---------------|---------------|--------|--------|---------------|---------------|
|        | 1500—2000m       | -             | 1.04%         | 0.42%  | 1.57%  | 15.91%        | <b>81.06%</b> |
|        | 2000—2500m       | -             | 0.23%         | 1.05%  | 1.72%  | 10.57%        | <b>86.44%</b> |
|        | 2500—3000m       | -             | 1.11%         | 1.27%  | 4.13%  | 10.22%        | <b>83.27%</b> |
|        | 3000—3500m       | -             | 1.53%         | 2.68%  | 5.58%  | 16.82%        | <b>73.39%</b> |
|        | 3500—4000m       | -             | 0.42%         | 2.17%  | 6.72%  | 24.63%        | <b>66.07%</b> |
|        | 4000—4500m       | 0.25%         | 7.86%         | 4.38%  | 8.39%  | 34.19%        | <b>44.94%</b> |
|        | 4500—5000m       | 0.54%         | 19.18%        | 18.03% | 23.06% | <b>31.16%</b> | 8.03%         |
|        | 5000—5500m       | 2.69%         | <b>50.07%</b> | 23.67% | 15.68% | 7.65%         | 0.24%         |
|        | >5500m           | <b>54.63%</b> | 43.86%        | 1.33%  | 0.17%  | 0.01%         | -             |
| Slope  | <5°              | 1.13%         | <b>32.15%</b> | 19.02% | 17.62% | 20.69%        | 9.38%         |
|        | 5—8°             | 0.69%         | 12.75%        | 14.74% | 18.44% | <b>29.59%</b> | 23.80%        |
|        | 8—15°            | 0.90%         | 9.52%         | 9.35%  | 14.96% | 30.41%        | <b>34.87%</b> |
|        | 15—25°           | 0.76%         | 9.45%         | 6.88%  | 10.37% | 25.61%        | <b>46.93%</b> |
|        | 25—35°           | 0.56%         | 7.59%         | 6.57%  | 9.48%  | 21.30%        | <b>54.50%</b> |
|        | >35°             | 1.18%         | 5.74%         | 6.86%  | 10.82% | 20.43%        | <b>54.97%</b> |
| Aspect | Flat             | <b>57.00%</b> | 38.57%        | 2.64%  | 1.09%  | 0.53%         | 0.18%         |
|        | Shady slope      | 0.88%         | 14.25%        | 12.39% | 14.46% | 24.74%        | <b>33.28%</b> |
|        | Semi-shady slope | 0.76%         | 12.93%        | 11.20% | 14.02% | 25.83%        | <b>35.25%</b> |
|        | Semi-sunny slope | 0.60%         | 15.05%        | 11.01% | 14.05% | 25.93%        | <b>33.36%</b> |
|        | Sunny slope      | 0.56%         | 20.40%        | 11.95% | 14.54% | 24.72%        | <b>27.83%</b> |

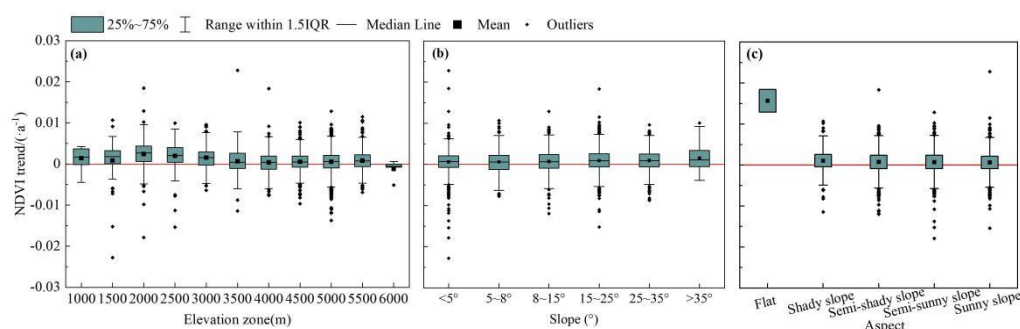

**Figure S3.** NDVI trends during 2000–2019 with different topographic factors in the basin (a, b, c show elevation, slope and aspect respectively).

**(a) Elevation**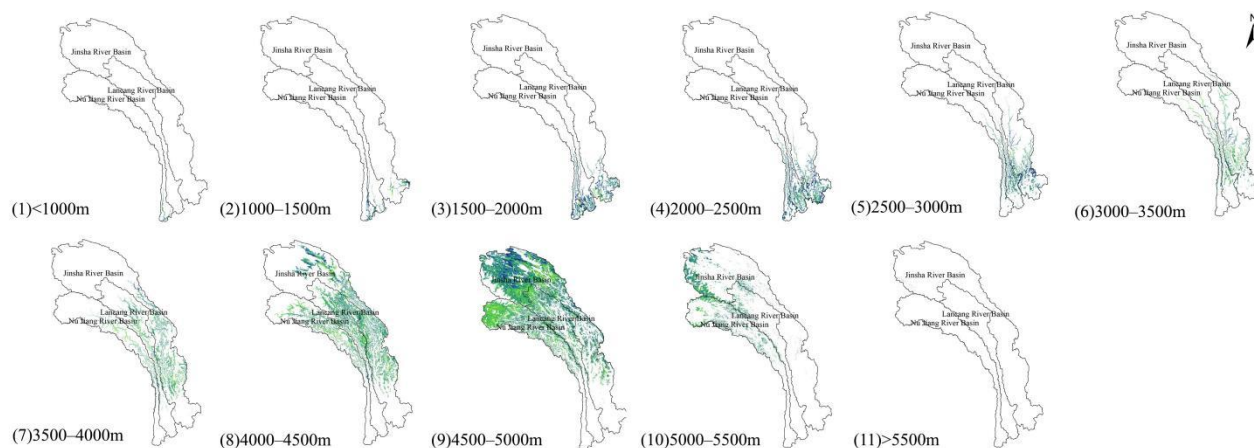**(b) Slope**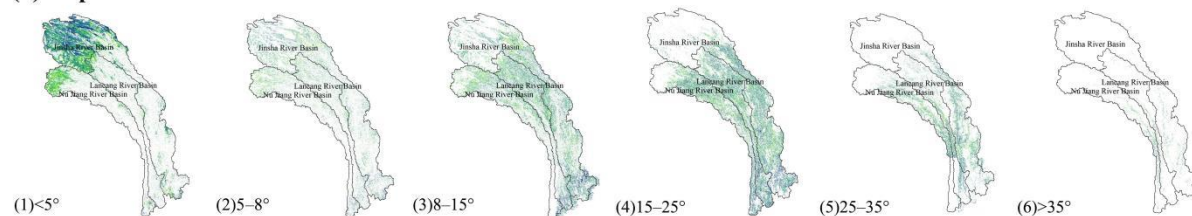**(c) Aspect**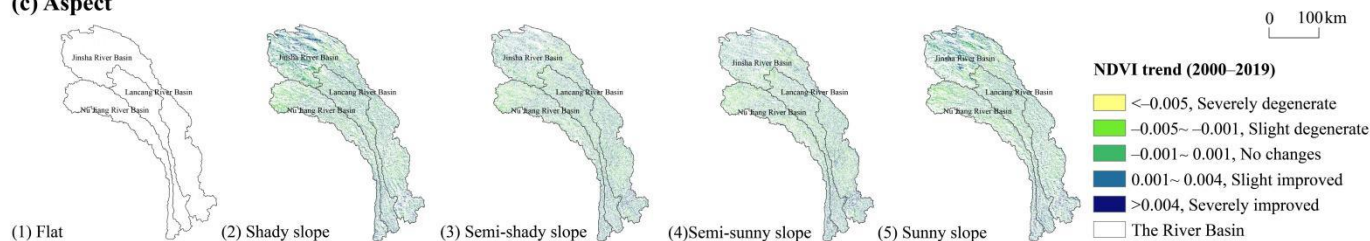**Figure S4.** Spatial distribution of NDVI trends for different topographic factors from 2000 to 2019.**Table S3.** Area statistics of NDVI trends for different topographic factors from 2000 to 2019.

| Topographic factors | NDVI trend | Severely degenerate<br>( $S_{NDVI} < -0.005$ ) | Slight degenerate<br>( $-0.005 \sim -0.001$ ) | No changes<br>( $-0.001 \sim 0.001$ ) | Slight improved<br>( $0.001 \sim 0.004$ ) | Severely improved<br>( $S_{NDVI} > 0.004$ ) |
|---------------------|------------|------------------------------------------------|-----------------------------------------------|---------------------------------------|-------------------------------------------|---------------------------------------------|
| Elevation           | <1000m     | 5.45%                                          | 20.14%                                        | 20.19%                                | <b>39.13%</b>                             | 15.10%                                      |
|                     | 1000–1500m | 6.51%                                          | 11.96%                                        | 18.49%                                | <b>41.96%</b>                             | 21.07%                                      |
|                     | 1500–2000m | 3.55%                                          | 9.24%                                         | 17.49%                                | <b>44.78%</b>                             | 24.94%                                      |
|                     | 2000–2500m | 1.47%                                          | 9.16%                                         | 22.41%                                | <b>45.74%</b>                             | 21.22%                                      |
|                     | 2500–3000m | 0.98%                                          | 11.29%                                        | 27.13%                                | <b>43.14%</b>                             | 17.45%                                      |
|                     | 3000–3500m | 2.70%                                          | 22.19%                                        | 32.97%                                | <b>33.06%</b>                             | 9.08%                                       |
|                     | 3500–4000m | 2.31%                                          | 23.72%                                        | <b>34.36%</b>                         | 32.90%                                    | 6.71%                                       |
|                     | 4000–4500m | 1.92%                                          | 21.85%                                        | <b>35.04%</b>                         | 34.81%                                    | 6.39%                                       |
|                     | 4500–5000m | 2.33%                                          | 22.69%                                        | 32.44%                                | <b>34.48%</b>                             | 8.07%                                       |
|                     | 5000–5500m | 1.62%                                          | 18.21%                                        | 34.04%                                | <b>37.19%</b>                             | 8.93%                                       |
|                     | >5500m     | 1.97%                                          | 14.28%                                        | <b>43.81%</b>                         | 31.57%                                    | 8.37%                                       |
| Slope               | <5°        | 1.97%                                          | 19.23%                                        | 35.30%                                | <b>37.07%</b>                             | 6.43%                                       |

|        |                  |        |        |        |               |        |
|--------|------------------|--------|--------|--------|---------------|--------|
|        | 5—8°             | 2.37%  | 23.38% | 32.17% | <b>33.50%</b> | 8.58%  |
|        | 8—15°            | 2.37%  | 21.63% | 30.65% | <b>34.91%</b> | 10.44% |
|        | 15—25°           | 2.08%  | 19.11% | 29.91% | <b>37.12%</b> | 11.78% |
|        | 25—35°           | 2.31%  | 19.03% | 29.41% | <b>36.94%</b> | 12.32% |
|        | >35°             | 2.60%  | 21.08% | 28.98% | <b>35.64%</b> | 11.70% |
| Aspect | Flat             | 10.86% | 21.05% | 23.46% | <b>23.59%</b> | 21.05% |
|        | Shady slope      | 1.86%  | 19.05% | 31.97% | <b>37.51%</b> | 9.60%  |
|        | Semi-shady slope | 2.35%  | 20.46% | 31.06% | <b>35.93%</b> | 10.20% |
|        | Semi-sunny slope | 2.39%  | 20.88% | 31.27% | <b>35.25%</b> | 10.21% |
|        | Sunny slope      | 2.23%  | 20.82% | 32.53% | <b>35.55%</b> | 8.88%  |

**Table S4.** Parameter estimation and test results of the OLS model.

| Variable  | Dominant factors | Coefficient | Std Error | t-Statistic | Probability | VIF  |
|-----------|------------------|-------------|-----------|-------------|-------------|------|
| Intercept | Constant term    | 1226.77     | 154.58    | 7.94        | 0.00***     | -    |
| X1        | DEM              | −0.41       | 0.03      | −13.17      | 0.00***     | 1.07 |
| X2        | Slope            | −1.65       | 3.17      | −0.52       | 0.60        | 1.07 |
| X3        | Aspect           | 0.24        | 0.28      | 0.87        | 0.39        | 1.00 |

Note: \*\*\* indicates that the significance test at 1% level is passed.

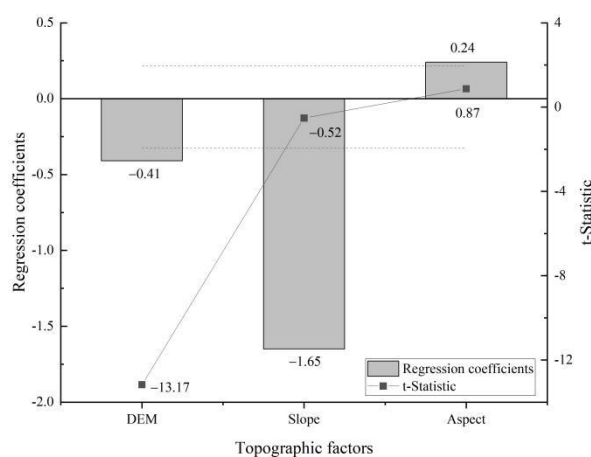

**Figure S5.** Estimation result of regression coefficients obtained through OLS modeling. (adjustment  $R^2$  is 0.03,  $F$  value is 60.76, and  $P < 0.01$ ; the two dashed lines denote that the  $t$ -value is equal to  $-1.96$  and  $1.96$  respectively; at 0.05 significance level,  $t < -1.96$  means a significantly negative correlation, while  $t > 1.96$  represents a positive correlation.)

**Table S5.** Comparison of model performance between the GWR and OLS models.

| Model parameters | AICc     | R <sup>2</sup> | Residuals SS   | Residuals df | Adjusted R <sup>2</sup> | Residuals MS | Residuals F |
|------------------|----------|----------------|----------------|--------------|-------------------------|--------------|-------------|
| OLS              | 90394.77 | 0.04           | 20901792171.05 | 4994.00      | 0.03                    | -            | -           |
| GWR              | 88935.99 | 0.42           | 12545519136.66 | 4325.67      | 0.33                    | 2900250.11   | 4.31        |
| Improvement      | 1458.77  | 0.39           | 8356273034.39  | 668.33       | -                       | -            | -           |
